# Supplementary material
Source: MDPI journal article supplement (https://www.mdpi.com/1424-8247/14/8/757)
Supplement: s1 [file s1]

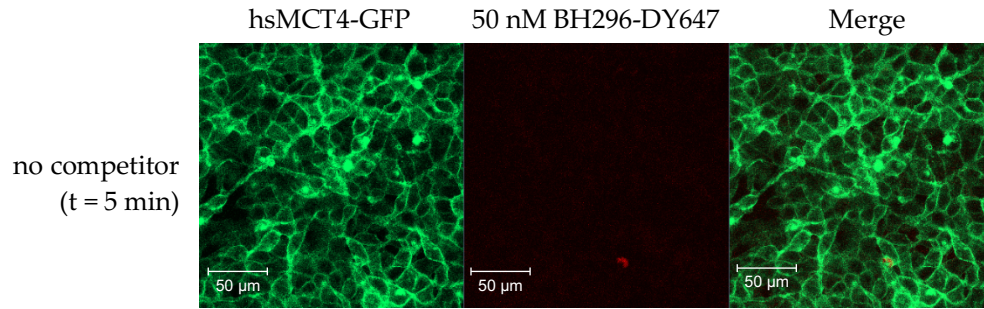

**Figure S1: Specificity of BH296-DY647 for PfFNT** Live cell imaging of hsMCT4-GFP stably expressed in HEK293 (left) cells and coincubation with BH296-DY647 (middle). No co-localization was observed (right).

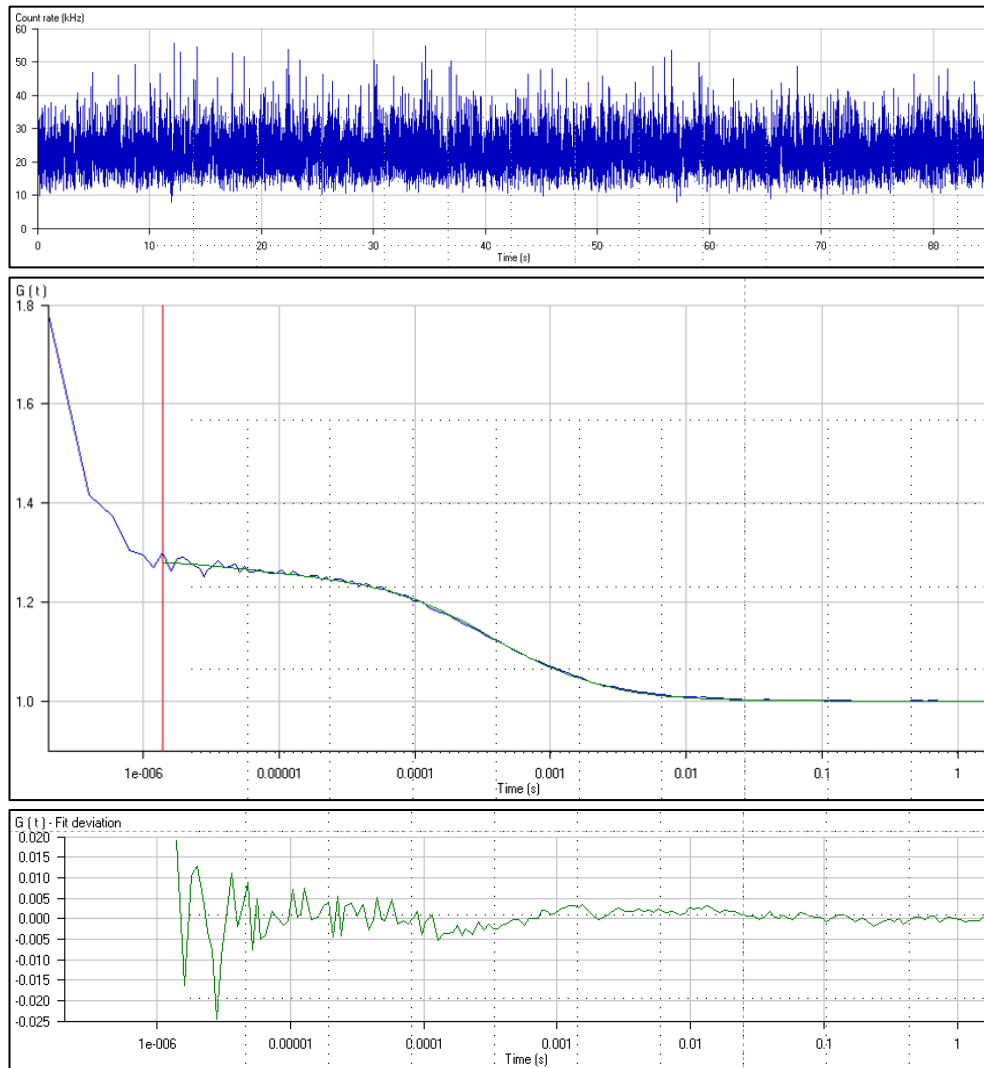

| Channel | Count rate [kHz] | Counts per molecule [kHz] | Amplitude Number particles | Component 1 Diffusion time [μs] |
|---------|------------------|---------------------------|----------------------------|---------------------------------|
| GFP     | 22.8             | 5.944                     | 2.536                      | 373                             |

**Figure S2: Homogeneous and monodispersed solubilization of PfFNT-GFP** FCS signal fluctuations induced by PfFNT-GFP solubilized in 1% LMNG (upper panel), corresponding correlation curve fitted to a 1 component diffusion model with fit deviation (lower panel).
